# Supplementary material
Source: Copernicus journal article supplement (doi:10.5194/ejm-38-325-2026)
Supplement: Supplementary file [file ejm-38-325-2026-supplement-title-page.pdf › ejm-38-325-2026-supplement-title-page.pdf]

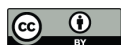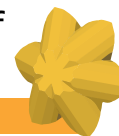

*Supplement of*

**Argentotennantite-(Fe),  $\text{Ag}_6(\text{Cu}_4\text{Fe}_2)\text{As}_4\text{S}_{13}$ , a new member of the tetrahedrite group from the San Genaro mine, Peru: occurrence and crystal structure**

Jiří Sejkora et al.

*Correspondence to:* Jiří Sejkora ([jiri.sejkora@nm.cz](mailto:jiri.sejkora@nm.cz))

- [ejm-38-325-2026-supplement-title-page.pdf](#)
- [argentotennantite\(Fe\)\\_TableS1.xlsx](#)
- [argentotennantite-\(Fe\)\\_checkcif.pdf](#)
- [argentotennantite.cif](#)

The copyright of individual parts of the supplement might differ from the article licence.
